# Supplementary material
Source: MDPI journal article supplement (https://www.mdpi.com/2073-4441/15/7/1429)
Supplement: s1 [file s1]

# Geochemistry of Metals and Organic Matter in Water and Sediments of the Karst River Cetina, Croatia

Krešimir Maldini, Neven Cukrov, Kristina Pikelj, Natalija Matić and Marina Mlakar

## Supplement materials

Table S1 Sampling points of sediment and water in the Cetina River (2016 to 2021)

| Mark     | Sampling points                       | Type of sample (W – water, S – sediment), description of sampling point | X and Y coordinates         |
|----------|---------------------------------------|-------------------------------------------------------------------------|-----------------------------|
| CS - 1   | Glavaš vrelo                          | W + S; spring, HR-R 12*                                                 | 43°58'36.25" ; 16°25'48.13" |
| CS - 2   | Batića vrelo                          | W + S; spring, HR-R 12*                                                 | 43°58'14.20" ; 16°25'15.24" |
| CS - 3   | Vuković vrelo                         | W (M) + S; spring, HR-R 12*                                             | 43°57'56.17" ; 16°24'46.27" |
| CR - 4   | Cetina Barišići                       | W (M); watercourse, HR-R 12*                                            | 43°58'10.30" ; 16°25'41.26" |
| CT - 5   | Pritok uzvodno od Vinalića            | W (M); tributary, HR-R_16A*                                             | 43°57'28.96" ; 16°24'27.96" |
| CT - 6   | Zduški potok                          | W (M); tributary, HR-R_16A*                                             | 43°56'11.96" ; 16°25'45.25" |
| CR - 7   | Cetina Vinalić                        | W (M) + S; watercourse, HR-R_12*                                        | 43°56'9.98" ; 16°26'33.01"  |
| CAL - 8  | HE Peruča 1                           | S; storage lake, n.a.                                                   | 43°50'42.24" ; 16°31'16.87" |
| CAL - 9  | HE Peruča 2                           | S; storage lake, n.a.                                                   | 43°49'48.05" ; 16°32'11.10" |
| CAL - 10 | HE Peruca 3                           | S; storage lake, n.a.                                                   | 43°49'29.67" ; 16°32'25.17" |
| CAL - 11 | HE Peruca 4                           | W (M); storage lake, HR-AD_13*                                          | 43°49'11.76" ; 16°32'42.90" |
| CAL - 12 | HE Peruca 5                           | S; storage lake, n.a.                                                   | 43°49'5.11" ; 16°32'42.53"  |
| CAL - 13 | HE Peruca 6                           | S; storage lake, n.a.                                                   | 43°48'42.48" ; 16°32'53.38" |
| CAL - 14 | HE Peruca 7                           | S; storage lake, n.a.                                                   | 43°48'32.28" ; 16°33'2.20"  |
| CAL - 15 | HE Peruca 8                           | S; storage lake, n.a.                                                   | 43°48'23.87" ; 16°33'20.28" |
| CAL - 16 | HE Peruca 9                           | S; storage lake, n.a.                                                   | 43°48'12.70" ; 16°33'54.87" |
| CR - 17  | Cetina Panj                           | W (M); watercourse, HR-R_12*                                            | 43°46'32.81" ; 16°37'54.89" |
| CT - 18  | Potok Rumin                           | W (M); tributary, HR-R_11*                                              | 43°46'34.23" ; 16°38'53.29" |
| CT - 19  | Vojskova                              | W (M); tributary, HR-R_16A*                                             | 43°45'25.57" ; 16°37'54.74" |
| CT - 20  | Mala Ruda izvorište                   | W (M); tributary, HR-R_16A*                                             | 43°40'27.98" ; 16°47'1.97"  |
| CT - 21  | Odvodni kanal HE Orlovac              | W (M); tributary, HR-R_12*                                              | 43°40'20.12" ; 16°46'56.09" |
| CT - 22  | Gornji kanal-pritok Cetine kod Trilja | W (M); tributary, HR-R_16A*                                             | 43°38'23.91" ; 16°42'57.72" |
| CT - 23  | Donji kanal-pritok Cetine kod Trilja  | W (M); tributary, HR-R_16A*                                             | 43°38'27.66" ; 16°43'2.29"  |
| CR - 24  | Cetina Trilj                          | W (M); watercourse, HR-R 12*                                            | 43°37'19.29" ; 16°43'52.98" |
| CAL - 25 | HE Đale 1                             | S; storage lake, n.a.                                                   | 43°34'54.26" ; 16°43'18.75" |
| CAL - 26 | HE Đale 2                             | S; storage lake, n.a.                                                   | 43°34'40.82" ; 16°42'56.55" |
| CAL - 27 | HE Đale 3                             | S; storage lake, n.a.                                                   | 43°34'31.04" ; 16°42'48.91" |
| CAL - 28 | HE Đale 4                             | S; storage lake, n.a.                                                   | 43°34'27.56" ; 16°42'43.08" |
| CAL - 29 | HE Đale 5                             | W (M); storage lake, HR-AD 9*                                           | 43°34'12.60" ; 16°42'22.95" |
| CAL - 30 | Cetina Prančevići                     | W (M); storage lake, HR-AD 8*                                           | 43°32'35.40" ; 16°44'19.01" |
| CR - 31  | Cetina Čikotine lađe                  | W (M) + S; watercourse, HR-R 12*                                        | 43°31'54.66" ; 16°44'50.44" |
| CR - 32  | Cetina Nejašmić                       | W (M); watercourse, HR-R 12*                                            | 43°26'44.82" ; 16°53'13.66" |
| CAL - 33 | HE Kraljevac                          | S; storage basin, n.a.                                                  | 43°25'54.17" ; 16°53'11.87" |
| CT - 34  | Zvizda gornji tok                     | W (M); tributary, HR-R 16A*                                             | 43°25'18.32" ; 16°53'27.53" |
| CT - 35  | Zvizda prije ušća                     | W (M); tributary, HR-R 16A*                                             | 43°25'53.21" ; 16°52'52.01" |

\*Type of surface water according to Croatian Regulation on water quality standard (OG 96/2019)

Table S2 Descriptive statistics of measured parameters in surface water samples at sites CS-1, CS-2, CS-3, CR-4, CR-7, CAL-11, CR-17, CR-24, CAL-29, CAL-30, CR-31, CR-32 in the Cetina River and CT-5, CT-6, CT-18, CT-19, CT-20, CT-21, CT-22, CT-23, CT-34, CT-35 in tributaries in the period 2016-2021.

| Indicator                                         | MAC*    | MAC**   | Biokovo Mt. Springs <sup>1</sup> | Gacka River springs <sup>2</sup> | Cetina River |       |         |         |         |       | Tributaries of the Cetina River |      |         |       |         |       |
|---------------------------------------------------|---------|---------|----------------------------------|----------------------------------|--------------|-------|---------|---------|---------|-------|---------------------------------|------|---------|-------|---------|-------|
|                                                   |         |         |                                  |                                  | N            | MAX   | MIN     | MEAN    | MEDIAN  | SD    | N                               | MAX  | MIN     | MEAN  | MEDIAN  | SD    |
| pH                                                | 7.0-9.0 | 6.5-9.5 | 7.57                             | 7.50                             | 468          | 8.46  | 6.92    | 7.94    | 7.95    | 0.271 | 412                             | 8.3  | 7.1     | 7.7   | 7.7     | 0.242 |
| Conductivity ( $\mu\text{Scm}^{-1}$ )             | n.a.    | 2500    | 283                              | 457                              | 468          | 706   | 253     | 379     | 363     | 61.3  | 413                             | 1499 | 225     | 584   | 531     | 230   |
| TDS ( $\text{mgL}^{-1}$ )                         | n.a.    | n.a.    | 201                              | 306                              | 468          | 473   | 169     | 254     | 243     | 41.0  | 413                             | 1004 | 151     | 391   | 356     | 154   |
| Alkalinity ( $\text{mgCaCO}_3\text{L}^{-1}$ )     | n.a.    | n.a.    | n.a.                             | 257                              | 468          | 413   | 102     | 168     | 167     | 24.2  | 413                             | 756  | 67.0    | 223   | 217     | 70.0  |
| Suspend solids ( $\text{mgL}^{-1}$ )              | n.a.    | 10      | n.a.                             | n.a.                             | 468          | 32.1  | < 2,0   | < 2.0   | < 2.0   | 2.26  | 404                             | 56.3 | < 2.0   | 2.1   | < 2.0   | 4.05  |
| Total Hardness ( $\text{mgCaCO}_3\text{L}^{-1}$ ) | n.a.    | n.a.    | n.a.                             | 236                              | 468          | 285   | 110     | 185     | 185     | 20.4  | 413                             | 1327 | 79.5    | 299   | 259     | 163   |
| $\text{HCO}_3^-$ ( $\text{mgL}^{-1}$ )            | n.a.    | n.a.    | n.a.                             | n.a.                             | 468          | 504   | 124     | 205     | 204     | 29.5  | 413                             | 922  | 82.0    | 272   | 265     | 85.4  |
| Turbidity (NTU)                                   | n.a.    | 4       | n.a.                             | 1.49                             | 251          | 12.1  | < 0.6   | 1.13    | 0.870   | 1.41  | 69                              | 11.5 | < 0.6   | 2.56  | 1.90    | 2.22  |
| Ammonium ( $\text{mgNL}^{-1}$ )                   | 0.05    | 0.50    | 0.029                            | 0.012                            | 468          | 0.978 | < 0.012 | 0.024   | < 0.012 | 0.054 | 412                             | 28.3 | < 0.012 | 0.479 | 0.020   | 2.25  |
| Nitrates ( $\text{mgNL}^{-1}$ )                   | 0.700   | 50      | 0.579                            | 0.197                            | 468          | 3.96  | < 0.230 | 0.260   | 0.250   | 0.206 | 412                             | 5.10 | < 0.230 | 0.547 | 0.388   | 0.587 |
| Nitrites ( $\text{mgNL}^{-1}$ )                   | n.a.    | 0.500   | 0.005                            | < 0.001                          | 467          | 0.110 | < 0.030 | < 0.030 | < 0.030 | 0.005 | 412                             | 2.60 | < 0.030 | 0.042 | < 0.030 | 0.184 |
| T ( $^{\circ}\text{C}$ )                          | n.a.    | 25      | 13.2                             | n.a.                             | 465          | 25.7  | 5.3     | 13.0    | 12.1    | 4.47  | 413                             | 25.1 | 1.6     | 13.2  | 12.5    | 4.11  |
| Orthophosphates ( $\text{mgPL}^{-1}$ )            | 0.030   | 0.300   | < 0.005                          | 0.005                            | 468          | 0.169 | < 0.006 | 0.005   | < 0.030 | 0.012 | 413                             | 3.0  | < 0.006 | 0.060 | < 0.006 | 0.293 |
| Fluorides ( $\text{mgL}^{-1}$ )                   | 1.5     | 1.5     | 0.065                            | 0.031                            | 122          | 0.080 | 0.012   | 0.036   | 0.035   | 0.012 | 143                             | 0.2  | 0.011   | 0.052 | 0.042   | 0.029 |
| Chlorides ( $\text{mgL}^{-1}$ )                   | n.a.    | 250     | 11.7                             | 3.23                             | 363          | 104   | < 1.5   | 16.6    | 9.40    | 16.8  | 268                             | 105  | 2.00    | 15.4  | 6.93    | 21.1  |
| Sulphates ( $\text{mgL}^{-1}$ )                   | n.a.    | 250     | 8.80                             | 5.39                             | 200          | 49.0  | < 2.4   | 16.1    | 16.4    | 5.42  | 210                             | 759  | 3.82    | 66.3  | 19.3    | 129   |
| DOC ( $\text{mgL}^{-1}$ )                         | n.a.    | n.a.    | n.a.                             | 0.489                            | 120          | 1.50  | < 0.3   | 0.780   | 0.795   | 0.250 | 17                              | 3.0  | 1.05    | 1.63  | 1.,59   | 0.514 |
| TOC ( $\text{mgL}^{-1}$ )                         | n.a.    | n.a.    | n.a.                             | n.a.                             | 467          | 6.90  | < 0.3   | 1.12    | 1.02    | 0.679 | 412                             | 15.0 | < 0.3   | 1.72  | 1.10    | 2.10  |
| $\text{O}_2$ ( $\text{mgL}^{-1}$ )                | n.a.    | n.a.    | n.a.                             | n.a.                             | 465          | 20.8  | 1.0     | 11.1    | 11.1    | 1.32  | 411                             | 14.0 | 1.20    | 10.1  | 10.4    | 2.13  |
| COD ( $\text{mgL}^{-1}$ )                         | 4       | 5       | n.a.                             | 0.556                            | 464          | 7.28  | < 0.5   | 1.44    | 1.20    | 0.990 | 412                             | 17.1 | < 0.5   | 2.21  | 1.50    | 2.30  |
| BOD ( $\text{mgL}^{-1}$ )                         | 3.4     | n.a.    | n.a.                             | n.a.                             | 460          | 8.80  | < 0.6   | 0.830   | < 0.030 | 0.971 | 394                             | 10.3 | < 0.6   | 1.29  | 0.730   | 1.40  |
| Calcium ( $\text{mgL}^{-1}$ )                     | n.a.    | n.a.    | 64.0                             | 81.9                             | 346          | 100   | 26.1    | 62.7    | 62.0    | 7.81  | 263                             | 502  | 26.3    | 98.8  | 86.0    | 60.8  |
| Potassium ( $\text{mgL}^{-1}$ )                   | n.a.    | 12      | 0.628                            | 0.349                            | 122          | 3.45  | < 0.280 | 0.731   | 0.702   | 0.389 | 205                             | 25.4 | < 0.280 | 2.03  | 1.16    | 3.25  |

|                                                 |      |      |       |       |     |       |         |       |         |       |     |      |         |       |         |       |
|-------------------------------------------------|------|------|-------|-------|-----|-------|---------|-------|---------|-------|-----|------|---------|-------|---------|-------|
| Magnesium (mgL <sup>-1</sup> )                  | n.a. | n.a. | 4.0   | 7.49  | 347 | 20.0  | < 0.600 | 6.71  | 6.45    | 2.30  | 263 | 81.0 | 2.14    | 8.70  | 7.95    | 5.93  |
| TN (mgNL <sup>-1</sup> )                        | 1.0  | n.a. | 0.794 | 0.573 | 452 | 2.30  | < 0.250 | 0.472 | 0.410   | 0.214 | 412 | 47.4 | < 0.250 | 2.13  | 0.650   | 5.66  |
| TP (mgPL <sup>-1</sup> )                        | 0.06 | n.a. | 0.011 | 0.013 | 458 | 0.410 | < 0.009 | 0.013 | < 0.009 | 0.031 | 413 | 4.19 | < 0.009 | 0.094 | < 0.009 | 0.407 |
| Sodium (mgL <sup>-1</sup> )                     | n.a. | 200  | 6.97  | 1.57  | 122 | 69.9  | 1.20    | 16.1  | 10.7    | 13.4  | 194 | 68.8 | 1.17    | 13.5  | 6.52    | 16.3  |
| Silicates (mgSiO <sub>2</sub> L <sup>-1</sup> ) | n.a. | 50   | n.a.  | n.a.  | 241 | 2.85  | < 0.110 | 1.31  | 1.25    | 0.624 | 17  | 12.0 | 1.40    | 4.20  | 2.30    | 3.18  |

\*Regulation on water quality standards (OG 96/2019) (MAC for good water condition)

\*\*Ordinance on compliance parameters, methods of analysis, monitoring and water safety plans for human consumption and the method of keeping a register of legal entities performing the activity of public water supply (OG 125/2017)

According to authors <sup>1</sup> [46]; <sup>2</sup> [49]

Table S3a Descriptive statistics of elements in surface water samples at sites CS-3, CR-7, CR-17, CR-31 in the Cetina River in the period 2016-2021

|                                             |                                       | Al<br>µg <sup>-1</sup> | As<br>µg <sup>-1</sup> | B<br>µg <sup>-1</sup> | Ba<br>µg <sup>-1</sup> | Be<br>µg <sup>-1</sup> | Cd<br>µg <sup>-1</sup> | Co<br>µg <sup>-1</sup> | Cr<br>µg <sup>-1</sup> | Cs<br>µg <sup>-1</sup> | Cu<br>µg <sup>-1</sup> | Fe<br>µg <sup>-1</sup> | Hg<br>µg <sup>-1</sup> | Li<br>µg <sup>-1</sup> | Mn<br>µg <sup>-1</sup> |
|---------------------------------------------|---------------------------------------|------------------------|------------------------|-----------------------|------------------------|------------------------|------------------------|------------------------|------------------------|------------------------|------------------------|------------------------|------------------------|------------------------|------------------------|
| MAC*                                        |                                       | n.a.                   | n.a.                   | n.a.                  | n.a.                   | n.a.                   | ≤ 0.08                 | n.a.                   | n.a.                   | n.a.                   | 40                     | n.a.                   | 0.07                   | n.a.                   | n.a.                   |
| MAC**                                       |                                       | 200                    | 10                     | 1000                  | 700                    | n.a.                   | 5                      | n.a.                   | 50                     | n.a.                   | 40                     | 200                    | 1                      | n.a.                   | 50                     |
| Mean values of<br>conc. in<br>surface water | Zrmanja river <sup>1</sup>            | 1.28                   | 0.203                  | n.a.                  | 14.5                   | n.a.                   | n.a.                   | 0.011                  | 0.217                  | 0.010                  | 0.063                  | 8.23                   | n.a.                   | 5.65                   | 0.168                  |
|                                             | Biokovo Mt.<br>Springs <sup>2</sup>   | 1.03                   | 0.110                  | n.a.                  | 12.0                   | n.a.                   | < LOQ                  | 0.083                  | 0.648                  | n.a.                   | 0.230                  | 2.80                   | n.a.                   | n.a.                   | 0.150                  |
|                                             | World rivers <sup>3</sup><br>(median) | 32.0                   | 0.630                  | 10.2                  | 23.0                   | 0.0089                 | 0.080                  | 0.148                  | 0.700                  | 0.011                  | 1.48                   | 66.0                   | n.a.                   | 1.84                   | 34.0                   |
| CS-3                                        | N                                     | 21                     | 21                     | 19                    | 19                     | 21                     | 21                     | 21                     | 21                     | 21                     | 21                     | 21                     | 18                     | 21                     | 21                     |
|                                             | MAX                                   | 27.1                   | 0.170                  | 4.42                  | 6.98                   | <0.005                 | 0.078                  | 0.231                  | 0.810                  | < 0.015                | 1.08                   | 58.1                   | 0.017                  | 0.649                  | 7.77                   |
|                                             | MIN                                   | 1.76                   | 0.074                  | 0.379                 | 3.98                   | <0.005                 | <0.010                 | <0.010                 | 0.145                  | < 0.015                | 0.390                  | 2.91                   | <0.010                 | <0.030                 | <0.050                 |
|                                             | MEAN                                  | 5.43                   | 0.109                  | 2.07                  | 5.36                   | <0.005                 | 0.018                  | 0.032                  | 0.307                  | < 0.015                | 0.687                  | 12.0                   | <0.010                 | 0.359                  | 0.715                  |
|                                             | MEDIAN                                | 3.45                   | 0.106                  | 2.34                  | 5.31                   | <0.005                 | 0.011                  | 0.012                  | 0.264                  | < 0.015                | 0.609                  | 7.71                   | <0.010                 | 0.383                  | 0.134                  |
|                                             | SD                                    | 5.34                   | 0.022                  | 1.27                  | 0.741                  | 0                      | 0.018                  | 0.057                  | 0.165                  | 0                      | 0.239                  | 12.1                   | 0.004                  | 0.175                  | 1.69                   |
| CR-7                                        | N                                     | 35                     | 35                     | 30                    | 34                     | 35                     | 35                     | 35                     | 30                     | 35                     | 15                     | 35                     | n.a.                   | 35                     | 35                     |
|                                             | MAX                                   | 35.5                   | 0.163                  | 4.35                  | 6.92                   | 0.005                  | 0.042                  | 0.257                  | 0.0657                 | 0.031                  | 2.25                   | 53.1                   | n.a.                   | 0.824                  | 5.36                   |
|                                             | MIN                                   | 1.27                   | 0.085                  | 0.329                 | 4.24                   | <0.005                 | <0.010                 | <0.010                 | 0.083                  | < 0.015                | 0.380                  | 4.23                   | n.a.                   | <0.030                 | 0.393                  |
|                                             | MEAN                                  | 8.40                   | 0.119                  | 1.87                  | 5.60                   | <0.005                 | 0.011                  | 0.030                  | 0.304                  | < 0.015                | 0.960                  | 20.7                   | n.a.                   | 0.383                  | 2.52                   |
|                                             | MEDIAN                                | 5.27                   | 0.117                  | 1.60                  | 5.69                   | <0.005                 | <0.010                 | 0.023                  | 0.276                  | < 0.015                | 0.856                  | 16.9                   | n.a.                   | 0.429                  | 2.33                   |
|                                             | SD                                    | 8.38                   | 0.019                  | 1.13                  | 0.752                  | 0.0004                 | 0.008                  | 0.041                  | 0.146                  | 0.004                  | 0.468                  | 12.9                   | n.a.                   | 0.197                  | 1.11                   |
| CR-17                                       | N                                     | 5                      | 6                      | 5                     | 5                      | 5                      | 5                      | 5                      | 6                      | 5                      | 6                      | 5                      | n.a.                   | 5                      | 5                      |
|                                             | MAX                                   | 13.3                   | 0.155                  | 0.718                 | 6.22                   | <0.005                 | <0.010                 | 0.021                  | 0.182                  | 0.019                  | 0.962                  | 28.4                   | n.a.                   | 0.447                  | 0.774                  |
|                                             | MIN                                   | 1.31                   | 0.120                  | 0.417                 | 5.72                   | <0.005                 | <0.010                 | 0.011                  | 0.114                  | < 0.015                | 0.243                  | 3.28                   | n.a.                   | 0.390                  | <0.050                 |
|                                             | MEAN                                  | 5.01                   | 0.132                  | 0.536                 | 5.99                   | <0.005                 | <0.010                 | 0.014                  | 0.144                  | < 0.015                | 0.664                  | 9.49                   | n.a.                   | 0.425                  | 0.268                  |
|                                             | MEDIAN                                | 3.14                   | 0.129                  | 0.546                 | 6.06                   | <0.005                 | <0.010                 | 0.013                  | 0.139                  | < 0.015                | 0.692                  | 5.08                   | n.a.                   | 0.435                  | 0.056                  |
|                                             | SD                                    | 4.26                   | 0.012                  | 0.105                 | 0.207                  | 0                      | 0                      | 0.003                  | 0.022                  | 0.005                  | 0.217                  | 9.49                   | n.a.                   | 0.022                  | 0.302                  |
| CR-31                                       | N                                     | 59                     | 58                     | 52                    | 51                     | 57                     | 59                     | 59                     | 52                     | 57                     | 59                     | 57                     | 28                     | 57                     | 57                     |
|                                             | MAX                                   | 31.1                   | 0.492                  | 6.90                  | 11.2                   | <0.005                 | 0.056                  | 0.338                  | 0.628                  | 0.048                  | 1.96                   | 32.6                   | 0.021                  | 1.34                   | 3.21                   |
|                                             | MIN                                   | 1.15                   | 0.127                  | 0.456                 | 6.16                   | <0.005                 | <0.010                 | <0.010                 | 0.060                  | < 0.015                | 0.375                  | 3.82                   | <0.010                 | 0.052                  | 0.485                  |
|                                             | MEAN                                  | 5.35                   | 0.224                  | 2.88                  | 7.97                   | <0.005                 | 0.016                  | 0.082                  | 0.287                  | < 0.015                | 0.859                  | 11.6                   | <0.010                 | 0.586                  | 1.60                   |
|                                             | MEDIAN                                | 3.74                   | 0.204                  | 3.06                  | 7.70                   | <0.005                 | 0.013                  | 0.030                  | 0.289                  | < 0.015                | 0.816                  | 10.4                   | <0.010                 | 0.549                  | 1.49                   |
|                                             | SD                                    | 5.13                   | 0.080                  | 1.65                  | 0.964                  | 0                      | 0.013                  | 0.086                  | 0.132                  | 0.009                  | 0.305                  | 6.38                   | 0.005                  | 0.300                  | 0.602                  |

\* Regulation on water quality standards (OG 96/219) (MAC for good water condition)

\*\* Ordinance on compliance parameters, methods of analysis, monitoring and water safety plans for human consumption and method of keeping a register of legal entities performing the activity of public water supply (OG 125/2017)  
According to authors <sup>1</sup>[50]; <sup>2</sup>[46]; <sup>3</sup>[4]

Table S3b Descriptive statistics of elements in surface water at sites CS-3, CR-7, CR-17, CR-31 in the Cetina River between in the period 2016-2021.

|                                             |                                       | Mo<br>µg <sup>-1</sup> | Ni<br>µg <sup>-1</sup> | Pb<br>µg <sup>-1</sup> | Rb<br>µg <sup>-1</sup> | Sb<br>µg <sup>-1</sup> | Se<br>µg <sup>-1</sup> | Sn<br>µg <sup>-1</sup> | Sr<br>µg <sup>-1</sup> | Ti<br>µg <sup>-1</sup> | Tl<br>µg <sup>-1</sup> | U<br>µg <sup>-1</sup> | V<br>µg <sup>-1</sup> | Zn<br>µg <sup>-1</sup> | Zr<br>µg <sup>-1</sup> |
|---------------------------------------------|---------------------------------------|------------------------|------------------------|------------------------|------------------------|------------------------|------------------------|------------------------|------------------------|------------------------|------------------------|-----------------------|-----------------------|------------------------|------------------------|
| MAC*                                        |                                       | n.a.                   | 4                      | 1.2                    | n.a.                   | n.a.                  | n.a.                  | 300                    | n.a.                   |
| MAC**                                       |                                       | n.a.                   | 20                     | 10                     | n.a.                   | 5                      | 10                     | n.a.                   | n.a.                   | n.a.                   | n.a.                   | n.a.                  | 5                     | 3000                   | n.a.                   |
| Mean values of<br>conc. in<br>surface water | Zrmanja River <sup>1</sup>            | 0.528                  | 0.054                  | < LOQ                  | 4.02                   | n.a.                   | n.a.                   | n.a.                   | 320                    | n.a.                   | n.a.                   | 0.442                 | 0.616                 | < LOQ                  | n.a.                   |
|                                             | Biokovo Mt.<br>Springs <sup>2</sup>   | 0.104                  | 0.249                  | 0.014                  | n.a.                   | < LOQ                  | 0.316                  | n.a.                   | 59.4                   | n.a.                   | n.a.                   | n.a.                  | 0.096                 | 0.599                  | n.a.                   |
|                                             | World rivers <sup>3</sup><br>(median) | 0.420                  | 0.810                  | 0.079                  | 1.63                   | 0.070                  | n.a.                   | n.a.                   | 60.0                   | 0.489                  | n.a.                   | 0.600                 | 0.710                 | 0.620                  | 0.039                  |
| CS-3                                        | N                                     | 21                     | 21                     | 21                     | 21                     | 21                     | 21                     | 21                     | 21                     | 21                     | 21                     | 21                    | 21                    | 21                     | 21                     |
|                                             | MAX                                   | 0.938                  | 1.87                   | 0.226                  | 0.409                  | 0.135                  | 0.280                  | 0.274                  | 244                    | 0.820                  | 0.021                  | 0.748                 | 0.894                 | 7.65                   | 0.145                  |
|                                             | MIN                                   | 0.144                  | 0.035                  | 0.033                  | 0.102                  | < 0.015                | < 0.090                | < 0.020                | 42.4                   | 0.042                  | < 0.003                | 0.307                 | 0.317                 | 0.440                  | < 0.030                |
|                                             | MEAN                                  | 0.481                  | 0.443                  | 0.114                  | 0.253                  | 0.040                  | 0.158                  | 0.035                  | 131                    | 0.195                  | 0.007                  | 0.517                 | 0.567                 | 1.93                   | 0.041                  |
|                                             | MEDIAN                                | 0.481                  | 0.288                  | 0.104                  | 0.255                  | 0.027                  | 0.170                  | 0.023                  | 128                    | 0.140                  | 0.006                  | 0.521                 | 0.542                 | 0.907                  | < 0.030                |
|                                             | SD                                    | 0.197                  | 0.460                  | 0.061                  | 0.065                  | 0.036                  | 0.073                  | 0.056                  | 46.9                   | 0.205                  | 0.005                  | 0.105                 | 0.134                 | 2.14                   | 0.040                  |
| CR-7                                        | N                                     | 30                     | 34                     | 34                     | 30                     | 35                     | 35                     | 35                     | 35                     | 30                     | 35                     | 30                    | 35                    | 35                     | 34                     |
|                                             | MAX                                   | 0.806                  | 1.23                   | 0.514                  | 0.397                  | 0.212                  | 0.344                  | 0.442                  | 247                    | 1.10                   | 0.021                  | 0.711                 | 0.626                 | 10.7                   | 0.102                  |
|                                             | MIN                                   | 0.199                  | < 0.015                | 0.029                  | 0.207                  | < 0.015                | < 0.090                | < 0.020                | 26.4                   | < 0.030                | < 0.003                | 0.416                 | 0.295                 | < 0.040                | < 0.030                |
|                                             | MEAN                                  | 0.456                  | 0.251                  | 0.128                  | 0.270                  | 0.059                  | 0.170                  | 0.066                  | 142                    | 0.242                  | 0.007                  | 0.532                 | 0.478                 | 2.10                   | 0.031                  |
|                                             | MEDIAN                                | 0.447                  | 0.190                  | 0.108                  | 0.269                  | 0.039                  | 0.185                  | < 0.020                | 144                    | 0.141                  | 0.005                  | 0.520                 | 0.484                 | 1.53                   | < 0.030                |
|                                             | SD                                    | 0.179                  | 0.268                  | 0.100                  | 0.045                  | 0.051                  | 0.075                  | 0.095                  | 53.0                   | 0.264                  | 0.005                  | 0.078                 | 0.071                 | 1.90                   | 0.024                  |
| CR-17                                       | N                                     | 5                      | 5                      | 5                      | 5                      | 5                      | 5                      | 5                      | 5                      | 5                      | 5                      | 5                     | 5                     | 6                      | 5                      |
|                                             | MAX                                   | 0.373                  | 0.329                  | 0.247                  | 0.367                  | 0.028                  | 0.252                  | 0.043                  | 145                    | 0.378                  | 0.011                  | 0.492                 | 0.460                 | 0.783                  | 0.077                  |
|                                             | MIN                                   | 0.279                  | 0.097                  | 0.030                  | 0.290                  | 0.015                  | 0.217                  | < 0.020                | 97.3                   | 0.092                  | 0.005                  | 0.455                 | 0.377                 | 0.313                  | < 0.030                |
|                                             | MEAN                                  | 0.321                  | 0.170                  | 0.082                  | 0.332                  | 0.022                  | 0.232                  | 0.021                  | 118                    | 0.190                  | 0.007                  | 0.472                 | 0.408                 | 0.587                  | 0.050                  |
|                                             | MEDIAN                                | 0.315                  | 0.130                  | 0.039                  | 0.339                  | 0.022                  | 0.232                  | 0.020                  | 105                    | 0.138                  | 0.005                  | 0.470                 | 0.389                 | 0.579                  | 0.051                  |
|                                             | SD                                    | 0.033                  | 0.085                  | 0.083                  | 0.031                  | 0.004                  | 0.013                  | 0.012                  | 19.7                   | 0.101                  | 0.002                  | 0.012                 | 0.031                 | 0.160                  | 0.021                  |
| CR-31                                       | N                                     | 52                     | 57                     | 59                     | 52                     | 57                     | 57                     | 59                     | 57                     | 51                     | 57                     | 52                    | 57                    | 59                     | 56                     |
|                                             | MAX                                   | 0.696                  | 1.23                   | 0.503                  | 0.646                  | 0.165                  | 0.388                  | 0.494                  | 247                    | 0.831                  | 0.028                  | 0.789                 | 0.969                 | 3.14                   | 0.228                  |
|                                             | MIN                                   | 0.256                  | < 0.015                | < 0.010                | 0.285                  | < 0.015                | < 0.090                | < 0.020                | 87.3                   | 0.038                  | < 0.003                | 0.411                 | 0.353                 | < 0.040                | < 0.030                |
|                                             | MEAN                                  | 0.435                  | 0.287                  | 0.150                  | 0.420                  | 0.061                  | 0.194                  | 0.086                  | 158                    | 0.224                  | 0.007                  | 0.547                 | 0.568                 | 1.19                   | 0.054                  |
|                                             | MEDIAN                                | 0.414                  | 0.225                  | 0.128                  | 0.396                  | 0.052                  | 0.206                  | 0.047                  | 158                    | 0.146                  | 0.005                  | 0.539                 | 0.551                 | 1.01                   | 0.038                  |
|                                             | SD                                    | 0.112                  | 0.218                  | 0.099                  | 0.093                  | 0.033                  | 0.088                  | 0.107                  | 38.7                   | 0.187                  | 0.006                  | 0.078                 | 0.104                 | 0.721                  | 0.051                  |

\* Regulation on water quality standards (OG 96/219) (MAC for good water condition)

\*\* Ordinance on compliance parameters, methods of analysis, monitoring and water safety plans for human consumption and method of keeping a register of legal entities performing the activity of public water supply (OG 125/2017)

According to authors <sup>1</sup>[50]; <sup>2</sup>[46]; <sup>3</sup>[4]

Table S4 Measured concentrations of observed elements in bulk fraction of the surface sediments

|                       | Min. toxic effects<br>(mg kg <sup>-1</sup> )* | Max. toxic effects<br>(mg kg <sup>-1</sup> )* | Concentration in surface water<br>sediment            |                                                                |                                                  | CS-1  | CS-2  | CS-3  | CR-7  | CAL-8 | CAL-9 | CAL-10 | CAL-12 | CAL-13 | CAL-14 | CAL-15 | CAL-16      | CAL-25 | CAL-26 | CAL-27 | CAL-28 | CR-31 | CAL-33 |
|-----------------------|-----------------------------------------------|-----------------------------------------------|-------------------------------------------------------|----------------------------------------------------------------|--------------------------------------------------|-------|-------|-------|-------|-------|-------|--------|--------|--------|--------|--------|-------------|--------|--------|--------|--------|-------|--------|
|                       |                                               |                                               | Zrmanja River<br>(bulk fraction<br>mean) <sup>1</sup> | Biokovo Mt.<br>springs<br>(bulk fraction<br>mean) <sup>2</sup> | World river<br>sediment<br>(median) <sup>3</sup> |       |       |       |       |       |       |        |        |        |        |        |             |        |        |        |        |       |        |
| Al %                  | n.a.                                          | n.a.                                          | 2.1                                                   | 1.65                                                           | 5.45                                             | 0.318 | 0.932 | 0.305 | 1.12  | 4.74  | 4.01  | 4.06   | 3.71   | 3.11   | 2.88   | 3.63   | 2.15        | 1.48   | 1.48   | 1.87   | 1.70   | 0.491 | 0.380  |
| As mgkg <sup>-1</sup> | 3                                             | 33                                            | 5.66                                                  | n.a.                                                           | 6.0                                              | 3.33  | 7.45  | 8.10  | 4.76  | 18.1  | 22.3  | 17.3   | 19.0   | 17.8   | 16.1   | 19.3   | 31.2        | 4.37   | 6.52   | 6.80   | 5.55   | 1.79  | 1.51   |
| B mgkg <sup>-1</sup>  | n.a.                                          | n.a.                                          | n.a.                                                  | n.a.                                                           | n.a.                                             | 0.497 | 0.982 | 0.426 | 2.88  | 7.52  | 5.78  | 4.97   | 4.15   | 3.02   | 2.72   | 2.83   | 1.58        | 2.13   | 3.42   | 1.78   | 5.40   | 0.767 | 1.11   |
| Ba mgkg <sup>-1</sup> | < 20                                          | 500                                           | 98.7                                                  | 64.0                                                           | 386                                              | 10.2  | 40.5  | 15.0  | 55.0  | 158   | 151   | 139    | 145    | 134    | 133    | 132    | 124         | 78.2   | 174    | 122    | 115    | 44.3  | 34.4   |
| Be mgkg <sup>-1</sup> | n.a.                                          | n.a.                                          | 0.693                                                 | 0.364                                                          | 1.44                                             | 0.182 | 0.671 | 0.281 | 0.908 | 1.70  | 1.47  | 1.58   | 1.56   | 1.42   | 1.35   | 1.69   | 1.15        | 0.990  | 0.798  | 0.894  | 1.18   | 0.333 | 0.216  |
| Ca %                  | n.a.                                          | n.a.                                          | 17.7                                                  | n.a.                                                           | 1.66                                             | 32.9  | 12.9  | 14.7  | 9.8   | 14.9  | 14.2  | 13.5   | 13.4   | 11.9   | 11.4   | 10.7   | 9.5         | 22.4   | 23.0   | 20.1   | 21.5   | 23.3  | 25.4   |
| Cd mgkg <sup>-1</sup> | 0.2                                           | 10                                            | 0.392                                                 | 0.314                                                          | 0.280                                            | 0.301 | 0.472 | 0.274 | 0.595 | 1.31  | 1.34  | 1.64   | 1.97   | 1.70   | 1.62   | 1.71   | 2.42        | 0.674  | 1.53   | 1.56   | 1.77   | 0.453 | 0.275  |
| Co mgkg <sup>-1</sup> | n.a.                                          | 50                                            | 4.55                                                  | 7.68                                                           | 8.0                                              | 1.16  | 7.07  | 2.61  | 4.37  | 10.5  | 10.5  | 9.97   | 10.6   | 10.7   | 9.26   | 11.5   | 10.8        | 6.69   | 7.85   | 8.32   | 8.27   | 2.60  | 1.62   |
| Cr mgkg <sup>-1</sup> | 26                                            | 110                                           | 34.4                                                  | 73.9                                                           | 63.0                                             | 7.36  | 21.1  | 15.7  | 20.7  | 67.2  | 60.4  | 62.9   | 71.9   | 66.5   | 65.1   | 77.0   | 68.7        | 33.8   | 44.5   | 49.0   | 56.0   | 12.6  | 9.68   |
| Cs mgkg <sup>-1</sup> | n.a.                                          | n.a.                                          | 2.84                                                  | n.a.                                                           | < 4.0                                            | 0.581 | 2.17  | 0.934 | 2.81  | 9.65  | 10.1  | 11.1   | 11.3   | 11.3   | 11.1   | 11.2   | 10.8        | 4.34   | 9.15   | 7.11   | 6.53   | 1.58  | 1.14   |
| Cu mgkg <sup>-1</sup> | 16                                            | 110                                           | 6.11                                                  | 13.1                                                           | 17.0                                             | 7.41  | 14.3  | 7.98  | 17.3  | 29.6  | 28.2  | 32.2   | 46.6   | 32.9   | 34.7   | 46.5   | 23.1        | 22.9   | 26.7   | 28.5   | 27.9   | 13.4  | 8.79   |
| Fe %                  | 2.12                                          | 4.38                                          | 1.06                                                  | n.a.                                                           | 2.47                                             | 0.429 | 1.46  | 1.11  | 1.33  | 3.45  | 3.81  | 3.39   | 3.46   | 3.42   | 3.14   | 3.58   | 3.60        | 1.36   | 2.53   | 1.91   | 2.31   | 0.59  | 0.433  |
| Hg mgkg <sup>-1</sup> | 0.2                                           | 2                                             | n.a.                                                  | n.a.                                                           | 0.038                                            | 0.209 | 0.091 | 0.062 | 0.079 | 1.59  | 0.128 | 0.183  | 0.143  | 0.261  | 0.124  | 0.471  | 0.174       | 0.211  | 0.322  | 0.177  | 0.103  | 0.166 | 0.053  |
| K mgkg <sup>-1</sup>  | n.a.                                          | n.a.                                          | 7800                                                  | n.a.                                                           | 16700                                            | 362   | 1363  | 516   | 1559  | 6379  | 5072  | 5000   | 5139   | 4442   | 4391   | 4931   | 2528        | 2230   | 3309   | 3079   | 3290   | 693   | 890    |
| Li mgkg <sup>-1</sup> | n.a.                                          | n.a.                                          | 26.8                                                  | n.a.                                                           | 20.8                                             | 3.27  | 16.3  | 6.66  | 20.8  | 58.7  | 47.9  | 46.7   | 44.7   | 41.3   | 37.0   | 46.3   | 30.0        | 21.1   | 16.6   | 21.8   | 26.8   | 9.63  | 7.15   |
| Mg %                  | n.a.                                          | n.a.                                          | 5.66                                                  | n.a.                                                           | 0.723                                            | 1.42  | 2.72  | 2.59  | 1.26  | 0.606 | 0.512 | 0.577  | 0.553  | 0.531  | 0.424  | 0.537  | 0.234       | 0.410  | 0.441  | 0.438  | 0.584  | 0.146 | 0.124  |
| Mn mgkg <sup>-1</sup> | 460                                           | 1100                                          | 170                                                   | 244                                                            | 620                                              | 95.2  | 487   | 82.0  | 153   | 753   | 1101  | 508    | 551    | 371    | 303    | 433    | 392         | 366    | 363    | 469    | 412    | 280   | 186    |
| Mo mgkg <sup>-1</sup> | n.a.                                          | 4                                             | 0.640                                                 | n.a.                                                           | 0.630                                            | 1.11  | 2.15  | 2.45  | 5.28  | 3.61  | 3.65  | 3.41   | 4.79   | 3.78   | 3.41   | 3.71   | <b>14.3</b> | 0.696  | 1.22   | 0.887  | 1.33   | 0.620 | 0.486  |
| N mgkg <sup>-1</sup>  | 550                                           | 4800                                          | n.a.                                                  | n.a.                                                           | n.a.                                             | 228   | 355   | 722   | 1760  | 730   | 845   | 1147   | 1566   | 944    | 816    | 1392   | 1214        | 1298   | 2365   | 2768   | 2624   | 2166  | 836    |
| Na mgkg <sup>-1</sup> | n.a.                                          | n.a.                                          | 7700                                                  | n.a.                                                           | 6670                                             | 151   | 137   | 26.6  | 229   | 387   | 374   | 501    | 323    | 241    | 177    | 680    | 104         | 214    | 275    | 499    | 383    | 187   | 159    |
| Ni mgkg <sup>-1</sup> | 35                                            | 75                                            | 12.2                                                  | 71.8                                                           | 21.0                                             | 6.47  | 19.1  | 9.99  | 16.0  | 58.1  | 53.2  | 55.7   | 57.8   | 56.8   | 55.1   | 66.1   | 49.3        | 30.0   | 35.2   | 39.5   | 33.7   | 12.7  | 7.95   |
| P mgkg <sup>-1</sup>  | 600                                           | 2000                                          | n.a.                                                  | n.a.                                                           | 61.0                                             | 103   | 388   | 466   | 806   | 677   | 656   | 506    | 546    | 461    | 625    | 623    | 516         | 576    | 867    | 1230   | 713    | 687   | 748    |
| Pb mgkg <sup>-1</sup> | 31                                            | 250                                           | 18.0                                                  | 87.9                                                           | 20.5                                             | 4.56  | 14.2  | 9.41  | 13.6  | 39.8  | 42.3  | 44.4   | 94.2   | 50.5   | 46.1   | 48.8   | 56.5        | 17.9   | 38.7   | 28.5   | 27.1   | 24.0  | 7.78   |
| Rb mgkg <sup>-1</sup> | n.a.                                          | n.a.                                          | 39.7                                                  | n.a.                                                           | 70.0                                             | 3.96  | 18.6  | 5.88  | 20.3  | 59.4  | 52.2  | 56.7   | 59.3   | 55.7   | 55.2   | 59.5   | 42.0        | 32.1   | 61.0   | 48.2   | 42.3   | 10.8  | 8.75   |
| Sb mgkg <sup>-1</sup> | 200                                           | 500                                           | 0.401                                                 | 2.35                                                           | 0.620                                            | 0.646 | 0.594 | 0.573 | 0.487 | 1.63  | 1.44  | 1.81   | 4.14   | 1.73   | 1.69   | 1.83   | 2.12        | 0.504  | 0.714  | 0.750  | 0.490  | 1.69  | 0.507  |
| Si mgkg <sup>-1</sup> | n.a.                                          | n.a.                                          | n.a.                                                  | n.a.                                                           | 28600                                            | 2758  | 6914  | 3424  | 9271  | 788   | 683   | 1118   | 2138   | 1156   | 6329   | 1414   | 664         | 6620   | 7188   | 7317   | 7786   | 6678  | 5611   |
| Se mgkg <sup>-1</sup> | n.a.                                          | n.a.                                          | n.a.                                                  | n.a.                                                           | n.a.                                             | 0.333 | 0.584 | 0.508 | 1.73  | 0.953 | 0.947 | 1.00   | 1.14   | 1.18   | 0.974  | 1.26   | 1.06        | 0.904  | 1.54   | 1.60   | 1.71   | 1.51  | 1.11   |
| Sn mgkg <sup>-1</sup> | n.a.                                          | n.a.                                          | 1.56                                                  | n.a.                                                           | 2.25                                             | 1.37  | 1.70  | 1.75  | 3.10  | 4.24  | 3.17  | 4.17   | 6.86   | 4.42   | 14.3   | 7.15   | 4.06        | 2.66   | 5.43   | 3.15   | 3.53   | 1.76  | 1.19   |
| Sr mgkg <sup>-1</sup> | n.a.                                          | n.a.                                          | 136                                                   | n.a.                                                           | 126                                              | 234   | 79.9  | 95.3  | 91.6  | 133   | 140   | 169    | 187    | 159    | 150    | 170    | 102         | 201    | 280    | 265    | 227    | 205   | 183    |

|                       |      |       |       |       |       |       |       |       |       |      |      |      |      |      |      |      |      |       |      |       |       |       |       |
|-----------------------|------|-------|-------|-------|-------|-------|-------|-------|-------|------|------|------|------|------|------|------|------|-------|------|-------|-------|-------|-------|
| Ti mgkg <sup>-1</sup> | n.a. | n.a.  | 1540  | n.a.  | 3740  | 73.2  | 447   | 293   | 476   | 918  | 616  | 697  | 738  | 708  | 793  | 938  | 795  | 519   | 626  | 673   | 721   | 147   | 125   |
| Tl mgkg <sup>-1</sup> | n.a. | n.a.  | 0.357 | 0.140 | 0.390 | 0.198 | 0.661 | 0.241 | 0.609 | 1.35 | 1.18 | 1.36 | 1.52 | 1.38 | 1.39 | 1.70 | 1.67 | 0.662 | 1.03 | 0.906 | 0.859 | 0.355 | 0.271 |
| U mgkg <sup>-1</sup>  | n.a. | n.a.  | 1.57  | n.a.  | 2.0   | 3.42  | 1.47  | 1.47  | 1.26  | 1.87 | 1.48 | 1.88 | 1.65 | 1.97 | 1.78 | 1.77 | 1.77 | 0.869 | 1.69 | 1.25  | 1.33  | 0.963 | 0.563 |
| V mgkg <sup>-1</sup>  | n.a. | n.a.  | 37.1  | 122   | 62.0  | 16.6  | 44.2  | 35.7  | 40.5  | 94.4 | 86.0 | 90.0 | 93.8 | 94.1 | 92.4 | 107  | 92.3 | 49.3  | 55.2 | 59.6  | 62.5  | 19.8  | 13.5  |
| Zn mgkg <sup>-1</sup> | < 90 | > 200 | 76.6  | 13.2  | 71.0  | 14.6  | 34.2  | 22.6  | 38.8  | 99.8 | 88.9 | 98.1 | 118  | 97.9 | 91.8 | 113  | 74.3 | 61.5  | 78.8 | 86.4  | 79.4  | 31.9  | 32.9  |
| Zr mgkg <sup>-1</sup> | n.a. | n.a.  | n.a.  | n.a.  | 391   | 3.91  | 13.2  | 6.32  | 16.9  | 33.1 | 26.4 | 31.4 | 35.0 | 33.5 | 37.0 | 42.3 | 33.4 | 16.3  | 27.7 | 24.6  | 25.5  | 7.0   | 4.30  |
| TOC %                 | n.a. | n.a.  | n.a.  | n.a.  | 1.71  | 4.36  | 2.84  | 2.32  | 7.37  | 2.02 | 1.33 | 2.05 | 1.02 | 1.78 | 2.28 | 1.57 | 2.0  | 4.34  | 3.14 | 4.04  | 4.6   | 3.38  | 5.37  |

\*According to available legislative for sediments of: USA federal criteria, Great Lakes; St. Lawrence River (Canada); Ontario (Canada) and British Columbia (Canada)  
According to authors<sup>1</sup>[50]; <sup>2</sup>[46]; <sup>3</sup>[54]

Table S5 Correlation coefficients of log-transformed data for 35 elements and TOC in bulk fraction of sediment\*

|     | Al    | As    | B     | Ba    | Be    | Ca    | Cd    | Co    | Cr    | Cs    | Cu    | Fe    | Hg    | K     | Li    | Mg    | Mn    | Mo    |
|-----|-------|-------|-------|-------|-------|-------|-------|-------|-------|-------|-------|-------|-------|-------|-------|-------|-------|-------|
| Al  | 1     |       |       |       |       |       |       |       |       |       |       |       |       |       |       |       |       |       |
| As  | 0.81  | 1     |       |       |       |       |       |       |       |       |       |       |       |       |       |       |       |       |
| B   | 0.88  | 0.54  | 1     |       |       |       |       |       |       |       |       |       |       |       |       |       |       |       |
| Ba  | 0.91  | 0.62  | 0.87  | 1     |       |       |       |       |       |       |       |       |       |       |       |       |       |       |
| Be  | 0.97  | 0.79  | 0.87  | 0.90  | 1     |       |       |       |       |       |       |       |       |       |       |       |       |       |
| Ca  | -0.56 | -0.75 | -0.34 | -0.42 | -0.64 | 1     |       |       |       |       |       |       |       |       |       |       |       |       |
| Cd  | 0.89  | 0.76  | 0.77  | 0.92  | 0.88  | -0.47 | 1     |       |       |       |       |       |       |       |       |       |       |       |
| Co  | 0.93  | 0.81  | 0.78  | 0.91  | 0.96  | -0.63 | 0.90  | 1     |       |       |       |       |       |       |       |       |       |       |
| Cr  | 0.95  | 0.84  | 0.80  | 0.92  | 0.95  | -0.58 | 0.95  | 0.97  | 1     |       |       |       |       |       |       |       |       |       |
| Cs  | 0.96  | 0.78  | 0.84  | 0.97  | 0.95  | -0.54 | 0.96  | 0.95  | 0.98  | 1     |       |       |       |       |       |       |       |       |
| Cu  | 0.94  | 0.70  | 0.83  | 0.93  | 0.94  | -0.49 | 0.92  | 0.92  | 0.94  | 0.96  | 1     |       |       |       |       |       |       |       |
| Fe  | 0.93  | 0.91  | 0.78  | 0.86  | 0.94  | -0.68 | 0.90  | 0.96  | 0.97  | 0.94  | 0.89  | 1     |       |       |       |       |       |       |
| Hg  | 0.54  | 0.39  | 0.45  | 0.46  | 0.45  | -0.04 | 0.44  | 0.42  | 0.46  | 0.47  | 0.48  | 0.43  | 1     |       |       |       |       |       |
| K   | 0.98  | 0.73  | 0.92  | 0.96  | 0.95  | -0.50 | 0.90  | 0.93  | 0.95  | 0.97  | 0.95  | 0.91  | 0.49  | 1     |       |       |       |       |
| Li  | 0.97  | 0.78  | 0.87  | 0.91  | 0.98  | -0.66 | 0.85  | 0.94  | 0.94  | 0.94  | 0.92  | 0.92  | 0.45  | 0.96  | 1     |       |       |       |
| Mg  | -0.15 | 0.16  | -0.19 | -0.39 | -0.06 | -0.21 | -0.26 | -0.06 | -0.14 | -0.26 | -0.22 | 0.02  | -0.11 | -0.21 | -0.15 | 1     |       |       |
| Mn  | 0.83  | 0.56  | 0.76  | 0.83  | 0.78  | -0.28 | 0.71  | 0.81  | 0.75  | 0.79  | 0.76  | 0.72  | 0.45  | 0.83  | 0.82  | -0.27 | 1     |       |
| Mo  | 0.57  | 0.85  | 0.37  | 0.38  | 0.60  | -0.88 | 0.55  | 0.58  | 0.59  | 0.53  | 0.45  | 0.70  | 0.17  | 0.47  | 0.60  | 0.25  | 0.26  | 1     |
| TN  | 0.29  | -0.03 | 0.41  | 0.57  | 0.37  | -0.04 | 0.49  | 0.38  | 0.40  | 0.45  | 0.49  | 0.29  | 0.03  | 0.39  | 0.34  | -0.48 | 0.27  | -0.08 |
| Na  | 0.69  | 0.23  | 0.74  | 0.69  | 0.63  | -0.03 | 0.61  | 0.54  | 0.55  | 0.63  | 0.72  | 0.46  | 0.50  | 0.70  | 0.62  | -0.30 | 0.68  | 0.00  |
| Ni  | 0.97  | 0.83  | 0.81  | 0.93  | 0.96  | -0.57 | 0.94  | 0.97  | 0.99  | 0.98  | 0.96  | 0.96  | 0.52  | 0.96  | 0.95  | -0.18 | 0.81  | 0.56  |
| TP  | 0.36  | 0.04  | 0.46  | 0.62  | 0.41  | -0.21 | 0.38  | 0.45  | 0.42  | 0.47  | 0.45  | 0.34  | 0.00  | 0.49  | 0.46  | -0.44 | 0.42  | -0.05 |
| Pb  | 0.88  | 0.75  | 0.72  | 0.91  | 0.86  | -0.55 | 0.91  | 0.89  | 0.91  | 0.93  | 0.92  | 0.88  | 0.42  | 0.87  | 0.88  | -0.33 | 0.75  | 0.55  |
| Rb  | 0.95  | 0.70  | 0.87  | 0.98  | 0.95  | -0.48 | 0.93  | 0.95  | 0.96  | 0.99  | 0.96  | 0.91  | 0.48  | 0.98  | 0.93  | -0.24 | 0.82  | 0.44  |
| Sb  | 0.63  | 0.67  | 0.37  | 0.53  | 0.54  | -0.48 | 0.61  | 0.53  | 0.59  | 0.61  | 0.62  | 0.59  | 0.41  | 0.55  | 0.61  | -0.31 | 0.50  | 0.57  |
| Si  | -0.53 | -0.74 | -0.34 | -0.32 | -0.42 | 0.42  | -0.42 | -0.40 | -0.47 | -0.44 | -0.33 | -0.54 | -0.47 | -0.42 | -0.49 | 0.07  | -0.42 | -0.63 |
| Se  | 0.41  | 0.00  | 0.55  | 0.67  | 0.46  | -0.17 | 0.53  | 0.44  | 0.44  | 0.53  | 0.55  | 0.34  | 0.08  | 0.51  | 0.47  | -0.56 | 0.39  | 0.00  |
| Sn  | 0.79  | 0.70  | 0.66  | 0.77  | 0.80  | -0.55 | 0.82  | 0.77  | 0.84  | 0.85  | 0.87  | 0.81  | 0.38  | 0.80  | 0.76  | -0.13 | 0.46  | 0.54  |
| Sr  | 0.02  | -0.32 | 0.14  | 0.18  | -0.08 | 0.71  | 0.19  | -0.09 | 0.03  | 0.10  | 0.19  | -0.13 | 0.25  | 0.09  | -0.12 | -0.47 | 0.08  | -0.61 |
| Ti  | 0.88  | 0.79  | 0.76  | 0.86  | 0.94  | -0.67 | 0.86  | 0.97  | 0.95  | 0.91  | 0.88  | 0.95  | 0.38  | 0.90  | 0.91  | 0.02  | 0.69  | 0.60  |
| Tl  | 0.96  | 0.83  | 0.80  | 0.93  | 0.96  | -0.64 | 0.94  | 0.96  | 0.97  | 0.98  | 0.94  | 0.95  | 0.48  | 0.95  | 0.95  | -0.19 | 0.78  | 0.63  |
| U   | 0.28  | 0.55  | 0.10  | 0.04  | 0.23  | -0.21 | 0.32  | 0.21  | 0.27  | 0.21  | 0.20  | 0.37  | 0.44  | 0.16  | 0.15  | 0.49  | 0.01  | 0.52  |
| V   | 0.93  | 0.92  | 0.74  | 0.83  | 0.95  | -0.69 | 0.89  | 0.96  | 0.97  | 0.93  | 0.89  | 0.99  | 0.45  | 0.90  | 0.92  | 0.05  | 0.69  | 0.70  |
| Zn  | 0.94  | 0.70  | 0.86  | 0.97  | 0.92  | -0.46 | 0.92  | 0.92  | 0.96  | 0.98  | 0.97  | 0.89  | 0.46  | 0.98  | 0.93  | -0.32 | 0.80  | 0.42  |
| Zr  | 0.95  | 0.81  | 0.81  | 0.92  | 0.97  | -0.63 | 0.95  | 0.97  | 0.98  | 0.98  | 0.96  | 0.96  | 0.47  | 0.95  | 0.94  | -0.10 | 0.73  | 0.61  |
| TOC | -0.62 | -0.81 | -0.34 | -0.46 | -0.54 | 0.49  | -0.54 | -0.59 | -0.63 | -0.58 | -0.56 | -0.69 | -0.34 | -0.55 | -0.59 | -0.01 | -0.54 | -0.58 |
|     | N     | Na    | Ni    | P     | Pb    | Rb    | Sb    | Si    | Se    | Sn    | Sr    | Ti    | Tl    | U     | V     | Zn    | Zr    | TOC   |
| N   | 1     |       |       |       |       |       |       |       |       |       |       |       |       |       |       |       |       |       |
| Na  | 0.42  | 1     |       |       |       |       |       |       |       |       |       |       |       |       |       |       |       |       |
| Ni  | 0.36  | 0.61  | 1     |       |       |       |       |       |       |       |       |       |       |       |       |       |       |       |
| P   | 0.80  | 0.35  | 0.40  | 1     |       |       |       |       |       |       |       |       |       |       |       |       |       |       |
| Pb  | 0.48  | 0.52  | 0.93  | 0.44  | 1     |       |       |       |       |       |       |       |       |       |       |       |       |       |

|     |       |       |       |       |       |       |       |       |       |       |       |       |       |       |       |       |       |   |
|-----|-------|-------|-------|-------|-------|-------|-------|-------|-------|-------|-------|-------|-------|-------|-------|-------|-------|---|
| Rb  | 0.49  | 0.68  | 0.97  | 0.54  | 0.90  | 1     |       |       |       |       |       |       |       |       |       |       |       |   |
| Sb  | 0.09  | 0.31  | 0.65  | 0.02  | 0.80  | 0.52  | 1     |       |       |       |       |       |       |       |       |       |       |   |
| Si  | 0.27  | -0.16 | -0.50 | 0.22  | -0.46 | -0.33 | -0.66 | 1     |       |       |       |       |       |       |       |       |       |   |
| Se  | 0.91  | 0.55  | 0.43  | 0.84  | 0.52  | 0.58  | 0.14  | 0.20  | 1     |       |       |       |       |       |       |       |       |   |
| Sn  | 0.35  | 0.44  | 0.83  | 0.32  | 0.82  | 0.82  | 0.60  | -0.23 | 0.40  | 1     |       |       |       |       |       |       |       |   |
| Sr  | 0.40  | 0.48  | 0.05  | 0.09  | 0.08  | 0.14  | -0.01 | 0.23  | 0.28  | 0.09  | 1     |       |       |       |       |       |       |   |
| Ti  | 0.42  | 0.46  | 0.92  | 0.52  | 0.82  | 0.92  | 0.41  | -0.32 | 0.46  | 0.79  | -0.15 | 1     |       |       |       |       |       |   |
| Tl  | 0.36  | 0.60  | 0.98  | 0.40  | 0.93  | 0.96  | 0.65  | -0.48 | 0.47  | 0.84  | -0.03 | 0.92  | 1     |       |       |       |       |   |
| U   | -0.40 | 0.07  | 0.27  | -0.60 | 0.20  | 0.14  | 0.36  | -0.47 | -0.42 | 0.35  | -0.03 | 0.17  | 0.27  | 1     |       |       |       |   |
| V   | 0.26  | 0.45  | 0.96  | 0.30  | 0.87  | 0.90  | 0.60  | -0.53 | 0.29  | 0.82  | -0.14 | 0.95  | 0.94  | 0.39  | 1     |       |       |   |
| Zn  | 0.51  | 0.68  | 0.97  | 0.55  | 0.92  | 0.98  | 0.59  | -0.39 | 0.58  | 0.81  | 0.18  | 0.89  | 0.94  | 0.09  | 0.88  | 1     |       |   |
| Zr  | 0.42  | 0.59  | 0.97  | 0.43  | 0.90  | 0.97  | 0.57  | -0.39 | 0.50  | 0.87  | -0.01 | 0.96  | 0.98  | 0.29  | 0.96  | 0.94  | 1     |   |
| TOC | 0.11  | -0.15 | -0.66 | 0.05  | -0.72 | -0.50 | -0.84 | 0.74  | 0.12  | -0.52 | 0.15  | -0.49 | -0.61 | -0.42 | -0.68 | -0.56 | -0.55 | 1 |

\*|r| 0.00 to 0.20: no or slightly correlated; 0.20 to 0.40 weak correlation; 0.40 to 0.70 real significant correlation; 0.70 to 1.00 high or very high correlation [59]
